# Supplementary material
Source: HighWire-hosted journal article supplement (https://erj.ersjournals.com/content/60/5/2201190)

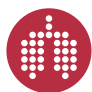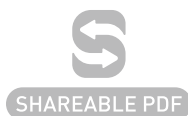

# Pulse oximeter measurement error of oxygen saturation in patients with SARS-CoV-2 infection stratified by smoking status

Colin J. Crooks <sup>1,2,3</sup>, Joe West <sup>2,3,4,5</sup>, Joanne R. Morling<sup>2,3,4</sup>, Mark Simmonds<sup>3</sup>, Irene Juurlink <sup>3</sup>, Steve Briggs <sup>3</sup>, Simon Cruickshank <sup>3</sup>, Susan Hammond-Pears <sup>3,5</sup>, Dominick Shaw <sup>3,6</sup>, Timothy R. Card<sup>2,3,4</sup> and Andrew W. Fogarty<sup>2,3,4</sup>

<sup>1</sup>Nottingham Digestive Diseases Centre, School of Medicine, University of Nottingham, Nottingham, UK. <sup>2</sup>NIHR Nottingham Biomedical Research Centre (BRC), Nottingham University Hospitals NHS Trust and the University of Nottingham, Nottingham, UK. <sup>3</sup>Nottingham University Hospitals NHS Trust, Nottingham, UK. <sup>4</sup>Lifespan and Population Health, School of Medicine, University of Nottingham, Nottingham, UK. <sup>5</sup>East Midlands Academic Health Science Network, University of Nottingham, Nottingham, UK. <sup>6</sup>NIHR Biomedical Respiratory Research Centre University of Nottingham, Nottingham, UK.

Corresponding author: Andrew W. Fogarty ([andrew.fogarty@nottingham.ac.uk](mailto:andrew.fogarty@nottingham.ac.uk))

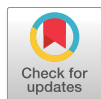

Shareable abstract (@ERSpublications)

**There is substantial measurement error in pulse oximetry readings of oxygen saturation below 90% which is not due to smoking status** <https://bit.ly/3RunKtL>

**Cite this article as:** Crooks CJ, West J, Morling JR, *et al.* Pulse oximeter measurement error of oxygen saturation in patients with SARS-CoV-2 infection stratified by smoking status. *Eur Respir J* 2022; 60: 2201190 [DOI: 10.1183/13993003.01190-2022].

This single-page version can be shared freely online.

Copyright ©The authors 2022.

This version is distributed under the terms of the Creative Commons Attribution Licence 4.0.

Received: 26 April 2022

Accepted: 26 Sept 2022

*To the Editor:*

Pulse oximeters provide a non-invasive measurement of oxygen saturation and are now routinely used to assess patients, inform medical decision-making and monitor subsequent clinical status.

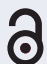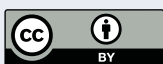

Supplement: inline-supplementary-material-1 [file inline-supplementary-material-1.pdf]
